# Supplementary material for: β-Glucuronidases of opportunistic bacteria are the major contributors to xenobiotic-induced toxicity in the gut
Source: PubMed Central journal article supplement (PMC6219552; doi:10.1038/s41598-018-34678-z), 2018-11-06
Supplement: 41598_2018_34678_MOESM1_ESM.pdf [file 41598_2018_34678_MOESM1_ESM.pdf]

# **$\beta$ -Glucuronidases of opportunistic bacteria are the major contributors to xenobiotic-induced toxicity in the gut**

**Punsaldulam Dashnyam<sup>1,2,3</sup>, Ramesh Mudududdla<sup>2</sup>, Tung-Ju Hsieh<sup>2</sup>, Ting-Chien Lin<sup>2</sup>, Hsien-Ya Lin<sup>2</sup>, Peng-Yuan Chen<sup>2</sup>, Chia-Yi Hsu<sup>2</sup>, and Chun-Hung Lin<sup>1,2,4,5,\*</sup>**

<sup>1</sup>Molecular and Biological Agricultural Sciences, Taiwan International Graduate Program, Academia Sinica and National Chung-Hsing University, Taipei 11529, Taiwan

<sup>2</sup>Institute of Biological Chemistry, Academia Sinica, Taipei 11529, Taiwan

<sup>3</sup>Graduate Institute of Biotechnology, National Chung-Hsing University, Taichung 40227, Taiwan

<sup>4</sup>Biotechnology Center, National Chung-Hsing University, Taichung 40227, Taiwan

<sup>5</sup>Department of Chemistry and Institute of Biochemical Sciences, National Taiwan University, Taipei 10617, Taiwan

\* [chunhung@gate.sinica.edu.tw](mailto:chunhung@gate.sinica.edu.tw)

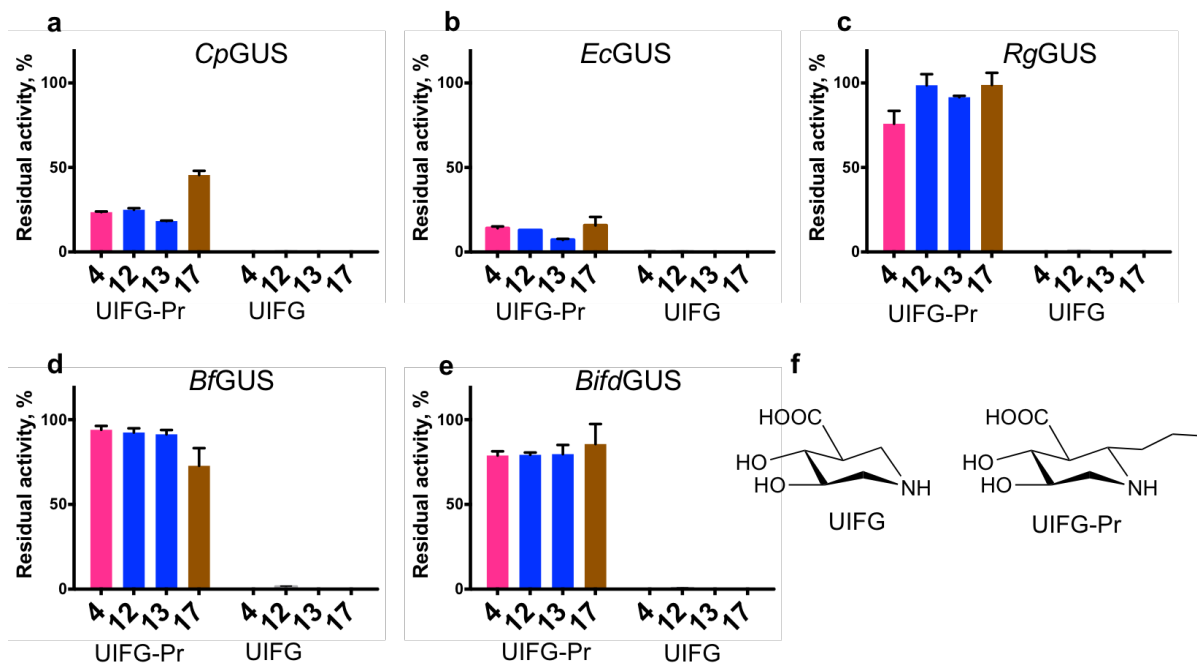

**Supplementary figure S1. UIFG-Pr selectively inhibits *CpGUS* and *EcGUS*.** Residual activities of GUSs upon inhibition of 1  $\mu$ M UIFG and 1  $\mu$ M UIFG-Pr (panels a-e) and molecular structures of the inhibitors (Panel f). UIFG universally inhibits the GUSs, whereas UIFG-Pr shows selectivity toward *CpGUS* and *EcGUS*.

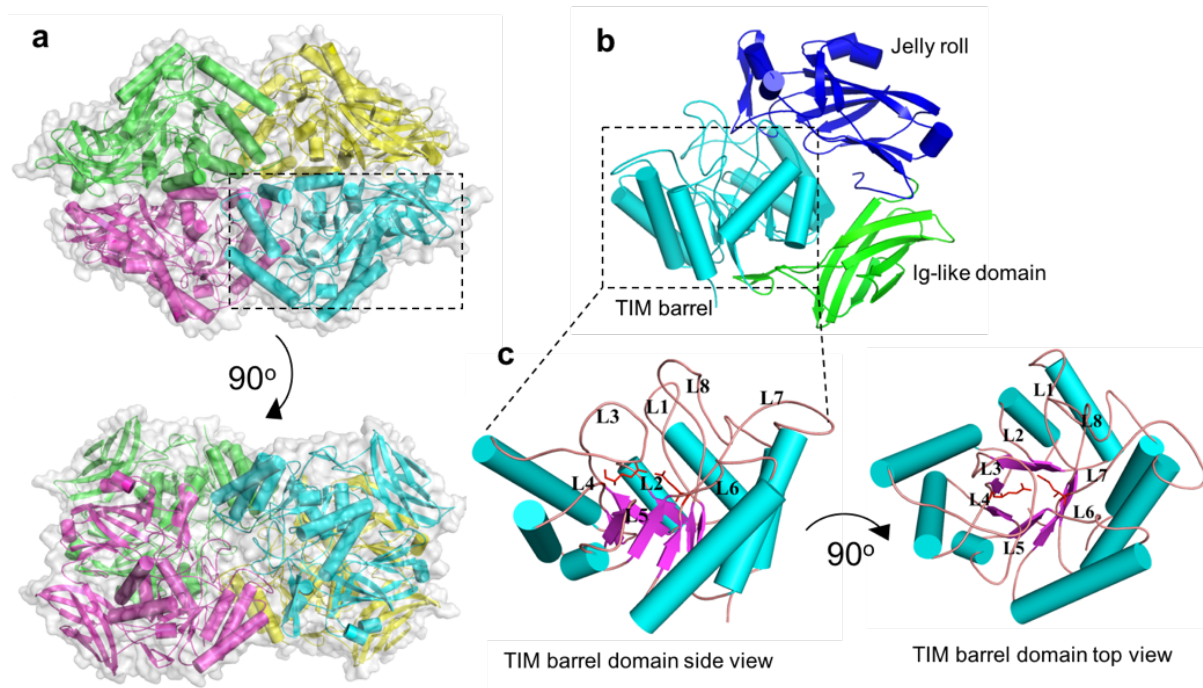

**Supplementary figure S2. Overall tetrameric and tertiary structures of *RgGUS*.** (a) A side and a top view of a *RgGUS* tetramer. (b) Each monomer consists of a N-terminal jelly-roll domain (blue), an immunoglobulin heavy chain-like domain (green), and a C-terminal TIM barrel domain (cyan). (c) A side and a top view of the TIM barrel domain that is composed of eight  $\alpha$ -helices (cyan) and eight  $\beta$ -sheets (magenta). These secondary structures are connected by  $\alpha/\beta$  and  $\beta/\alpha$  loops (wheat) that constitute substrate-binding site of the GUS. These loops are numbered from 1 to 8 starting from the N-terminus of the TIM barrel domain.

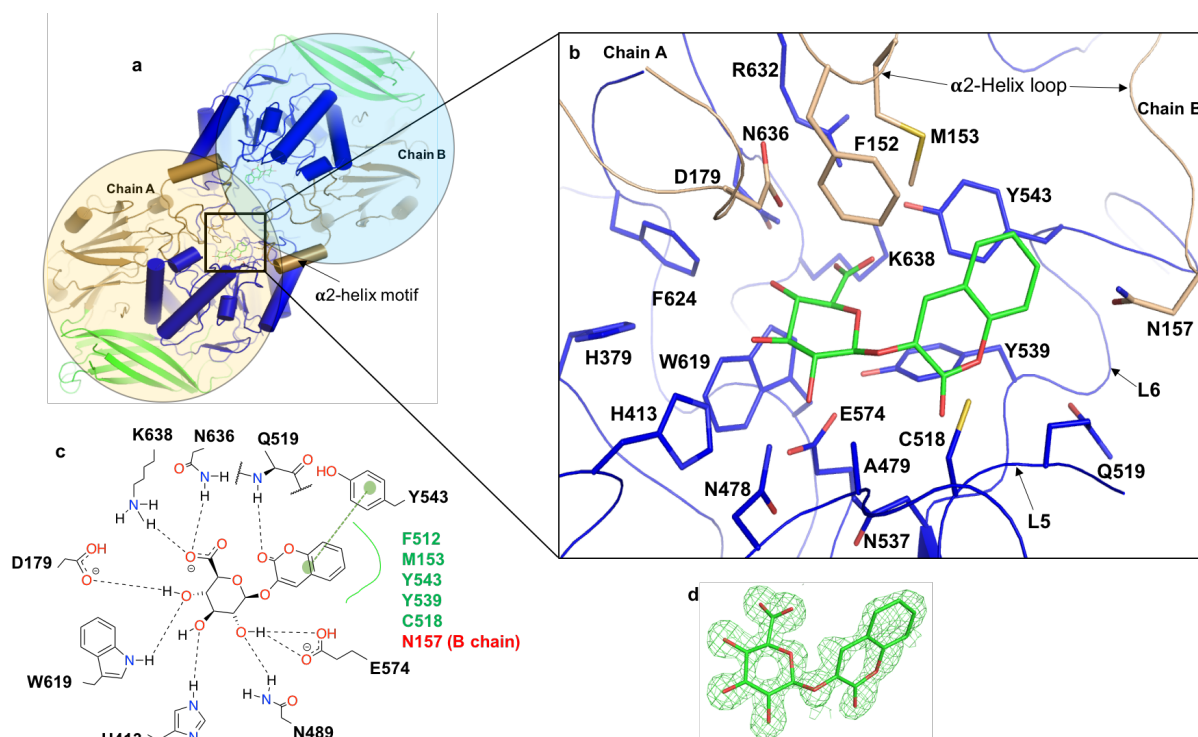

**Supplementary figure S3. A substrate-binding site of *BifdGUS*.** (a) A dimer of tetrameric *BifdGUS*<sup>E479A</sup> complexed with substrate **10**. A tertiary structure of the enzyme consists of a jelly-roll (wheat), an immunoglobulin heavy chain-like (green), and a TIM barrel domain (blue). (b) A close-up image of the *BifdGUS*<sup>E479A</sup>/**10**. **10** is shown as green stick. The amino acid residues (shown as sticks) interacting with **10** are shown in blue and wheat sticks. Aglycone-binding site of the enzyme is formed by  $\alpha$ 2-helix loops of the two adjacent chains (shown as A and B chains), loop 5, and loop 6. Loops 5 (L5) and 6 (L6) are at the TIM barrel domain; the  $\alpha$ 2-helix loop is resided at the jelly-roll domain. Panel **b** shows the aglycone-binding site of A chain. Residues F152 and M153 are from the  $\alpha$ 2-helix loop at the jelly-roll domain of A chain, residue N157 is from the  $\alpha$ 2-helix loop at the jelly-roll domain of B chain. Residue D179 that makes a hydrogen bonding with 4-OH of glucuronic acid moiety of **10** locates at the jelly-roll domain. (c) 2D representation shows the important interactions between *BifdGUS*<sup>E479A</sup> and **10**. (d) 2Fo-Fc omit map of **10** counteracted at  $\sigma$  level=1, carved at 1.6.

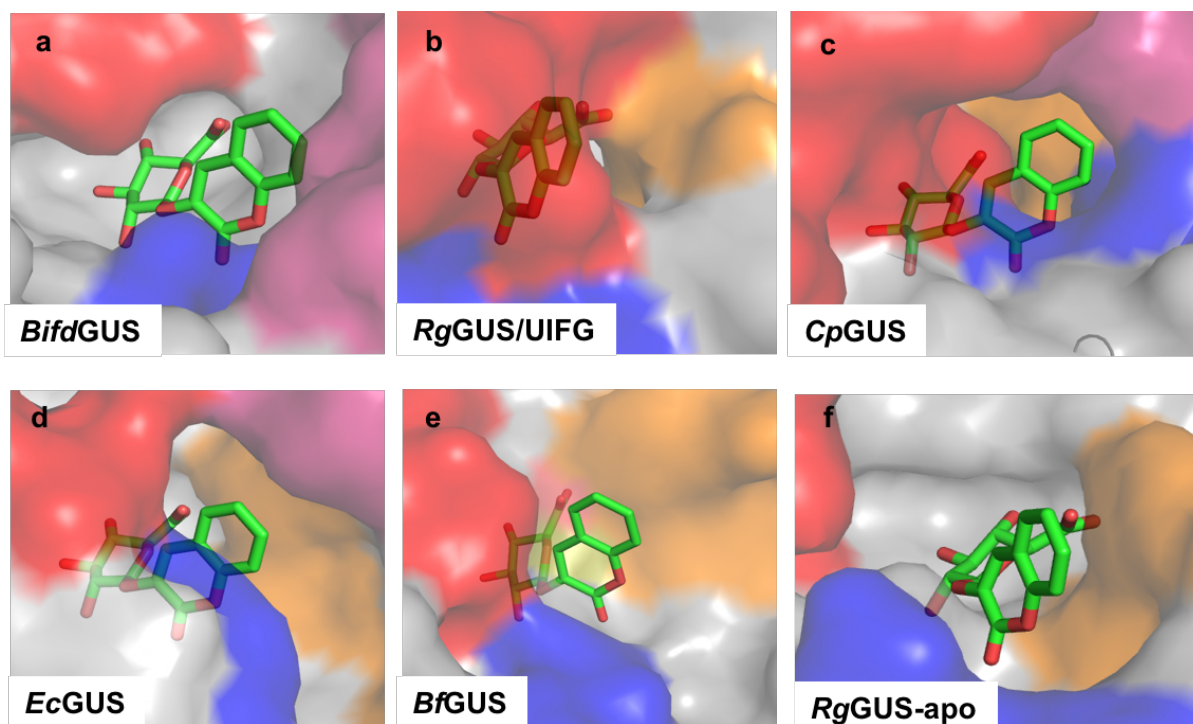

Loop 3/ $\alpha$ 2-helix loop (A chain)    Loop 5  
 Loop 3/ $\alpha$ 2-helix loop (B chain)    Loop 6

**Supplementary figure S4. Surface presentations showing the active site architectures of the five bacterial GUSs.** *CpGUS* (c) and *EcGUS* (d) have similar small aglycone-binding sites. The aglycone-binding sites of *BfGUS* (e) and *BifdGUS* (a) are relatively larger because their loops 3 are shorter than that of the former two enzymes. Tip of loop 3 is ordered in *RgGUS/UIFG* complex (b), but it is disordered in apo *RgGUS* as shown in panel f. **10** is shown as green sticks. Images in panels b-f were produced by superimposing them on the *BifdGUS*<sup>E479A</sup>/**10** complex, which is not shown for clarity reason.

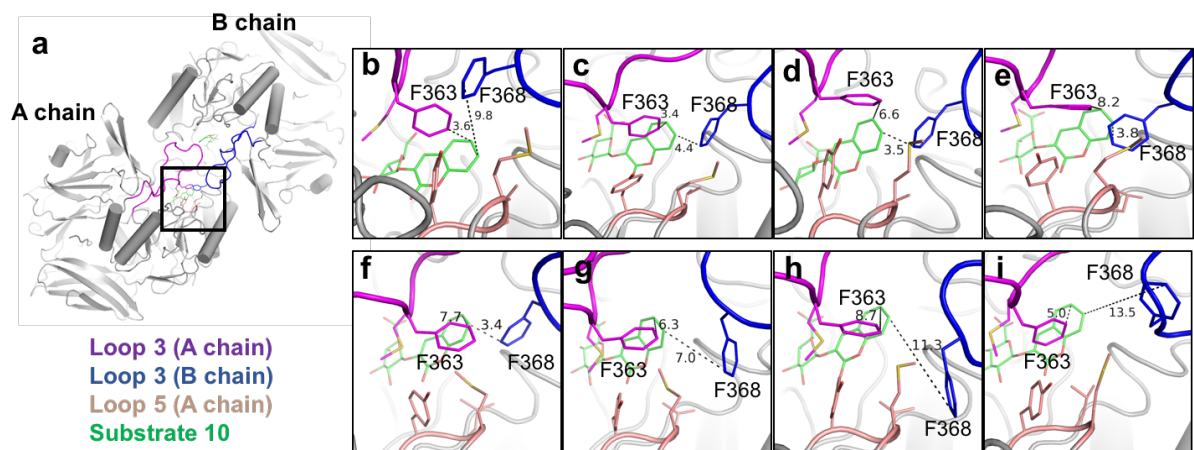

**Supplementary figure S5. Flexibility at the aglycone-binding site of *CpGUS*.** (a) A dimeric structure of *CpGUS*. Loops 3 of A and B chains are colored in magenta and blue, respectively (b)-(i). Distance between F363 (A chain) and F368 (B chain) to C6 and C7 of **10**, respectively, fluctuated during the MD simulations.



**(a) The *Bifd*GUS group:  $\alpha$ 2 helix loop**

|                |     |                          |        |           |                |                    |
|----------------|-----|--------------------------|--------|-----------|----------------|--------------------|
| WP_012902563.1 | 130 | DNRIGSSTLPVGNDA-GTAFVGS  | DNANVP | PAVA---   | EAKKH-----     | AR-RQN             |
| WP_034874654.1 |     | DNRIGSSTLPVGNDA-GTAFVGS  | DNANVP | PAVA---   | EAKKH-----     | AR-RQN             |
| CBL12719.1     |     | DNRINHSTLPVGNEE-GTSEFMG  | ADNAGV | PGVEAAKRW | NEEGT          | SFMGADNAGVPGVERKPN |
| WP_007715113.1 |     | DNRISHSTLPVGNEG-TTAFVGS  | DNPGV  | PSV---    | EAAKKW-----    | R--GQQN            |
| SEU10886.1     |     | DNRISHSTLPVGNEG-TTAFVGS  | DNPGV  | PSV---    | EAAKKW-----    | R-GQQN             |
| WP_024735652.1 |     | DNRISHSTLPVGNEG-TTAFVGS  | DNPGV  | PSV---    | EAAKKW-----    | R--GQQN            |
| WP_006863968.1 |     | DNHVNHSTLPVGNES-ATAFVGS  | DNPGV  | PSV---    | EAAKLWR-----   | RPQN               |
| CUO31707.1     |     | DNRVNHSTLPVGNEG-STAFVGS  | DNPGV  | PSV---    | EAAKLWR-----   | KPN                |
| WP_005943354.1 |     | DNRVNHSTLPVGNEDGQLAFVGS  | DNAGV  | PSV---    | EAAKFA-----    | AA----PN           |
| WP_065547790.1 |     | DNRINHSTLPAGNDPKETAFVGS  | DNAGV  | PSV---    | EQAKRE-----    | QKLQ---N           |
| WP_002587560.1 |     | DNRINHSTLPAGNDPTEAFVGS   | DNAGV  | PSV---    | EQAKRE-----    | QKLQ---N           |
| WP_044994201.1 |     | NNRVDHHTLPMGNEEG-TAFVGS  | DNAQV  | PSV---    | QKAKEHRGIV---  | -----N             |
| SFG50938.1     |     | NNRVDHHTLPMGNEEDG-TAFVGS | DNAQV  | PSV---    | QMAKEHRGIV---  | -----N             |
| WP_087384128.1 |     | DNRVNRNTLPVGNPEGTAFVGS   | DNAGV  | PSV---    | EHAKAN-AK----- | -----PMN           |

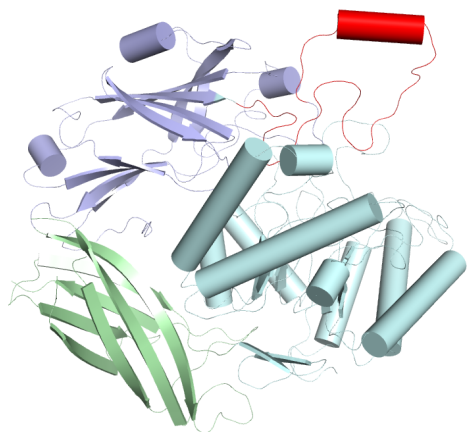

**(b) The *Ec*GUS group: Loop 3**

|                |     |                                             |
|----------------|-----|---------------------------------------------|
| WP_085460699.1 | 315 | IDETAAVGFNLSLGI-GFEAG-NKPKELYSEEAVNGETQQAH  |
| OUZ60539.1     |     | IDETAAVGFNLSLGI-GFEAG-NKPKELYSEEAVNGETQQAH  |
| WP_039064923.1 |     | IDETAAVGFNLSLGI-GFEAG-NKPKELYSEEAVNGETQQAH  |
| WP_080224385.1 |     | IDETAAVGFNLSLGI-GFDSC-EKPKALYSEEGVNDDETQQAH |
| WP_039046752.1 |     | IDETAAVGFNLSLGI-GFDSC-EKPKALYSEEGVNDDETQRAH |
| WP_032697836.1 |     | IDETAAVGFNLSLGI-GFDAC-EKPTSLSYGDDATDDRTQQAH |
| WP_034458256.1 |     | INETAAVGFNLSLGIT-FDAG-ERPKELYSEEAVNGETQQAH  |
| WP_049560671.1 |     | INETPAVGFNLALGLN-FDSV-QKPKELSLSEAVNGQTQQAH  |
| WP_077173911.1 |     | INETPAVGLNLALGFN-FDVT-QKPANLSEEAINGQTQQAH   |

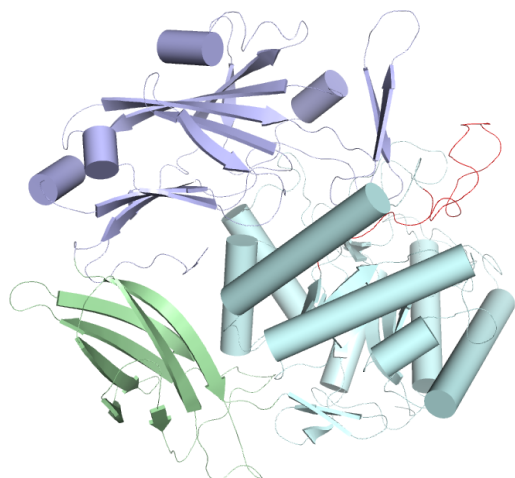



### (c) The CpGUS group: Loop 3

|                |     |                               |                  |
|----------------|-----|-------------------------------|------------------|
| WP_003467686.1 | 301 | IDETPAVGLHLNFMATG--EGGDAPKRD  | TWKEIGTKEAHERILL |
| WP_008680773.1 |     | IDETPAVGMHLNFMATG--EGGDAAKRD  | TWKEIRTKEAHEQVL  |
| WP_005212204.1 |     | IDETPAVGLHLNFMATGGL-EGDSV-KRD | TWKEIGTKEAHEQVL  |
| WP_045726255.1 |     | IDETPAVGLHLNFMATGGL-EGGGV-KRD | TWKEIGTKEAHEQILL |
| WP_066874435.1 |     | IDETPAVGLHLNFMATGGL-EGGGV-KRD | TWREIGTKQAHEQVL  |
| WP_002598286.1 |     | IDETPAVGLHLNFMATG-L-EGSGV-KRD | TWKEIQTKEAHEQVI  |
| WP_074079011.1 |     | IDETPAVGMHLNFMAT--MAGAE-KRD   | TWKEIQTFEHHKDLI  |
| WP_039680969.1 |     | IDETPAVGMHLNFMAT--MAGAE-KRD   | TWKEIQTFEHHKDLI  |
| WP_055069253.1 |     | IDETPAVGLHLNFMAT--L-EGSGV-KRD | TWKEIQTKEAHEQVI  |
| WP_073119987.1 |     | IDETPAVGLHLNFMAT--L-EGSGV-KRD | TWKEIQTKEAHEQVI  |
| WP_060814749.1 |     | IDETPAVGLHLNFMAT--L-EGSGV-KRD | TWKEIQTKEAHEQVI  |
| WP_054027879.1 |     | IDETPAVGLHLNFMAT--L-EGSGV-KRD | TWKEIQTKEAHEQVI  |
| AAK29422.1     |     | IDETPAVGLHLNFMAT--L-EGSGV-KRD | TWKEIQTKEAHEQVI  |
| WP_068783612.1 |     | IDETPAVGLHLNFMAT--L-EGSGV-KRD | TWKEIQTKEAHEQVI  |
| ARB39939.1     |     | IDETPAVGLHLNFMAT--L-EGSGV-KRD | TWKEIQTKEAHEQVI  |
| WP_037589849.1 |     | IDETPAVGLHLNFMAT--L-EGSGV-KRD | TWKEIQTKEAHEQVI  |
| WP_037558698.1 |     | IDETPAVGLHLNFMAT--L-EGSGV-KRD | TWKEIQTKEAHEQVI  |

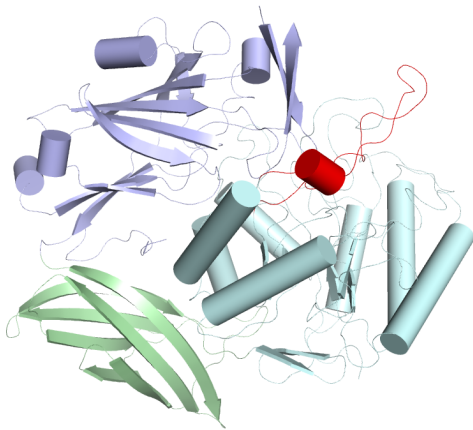

### (d) The RgGUS group: Loop 3

```

AAQ76046.1      357  IDEVPAVGMMRSTRNFVAA--GSGNYTYFFEA--LTV--PEL--LKSH
WP_026889983.1  IDEVPAVGMMRSTRNFAAA--GTGQYTGFFET--PTV--PNL--QKAH
WP_024835204.1  IDEVPAVGMMRSTRNFAAA--GTGKYTGFFET--PTV--PNL--QKAH
WP_029471552.1  IDEVPAVGLFESLMNFMEASTGK-KT-AFFAK--DTI--PEL--LENH
WP_018595336.1  IDEVPAVGLFESLMNFMEASTGK-KT-AFFAK--DTI--PEL--ENH
WP_087417720.1  IDEVPAVGLFESLMNFMEAST---KATAFFEKET---TPVL--LQAH
P_027217722.1   IDEVPAVGMMRSTHNFVDAGTG--KYTYFFETP--TV---GTL--QKNH
WP_034927075.1  IDEVPAVGMMRSLMNFAAAGAG--GKDTRFFT-ADTV---POL--QANH
WP_087020307.1  IDEVPAVGMPESLMNFMDASSG--KQTAFFAQ-ETA---PEL--QKNH
WP_026510287.1  IDEVPAVGMMRSFFNFMDAGSGG--KYTYFFE---T-DTVPOL--QKNH
WP_077611355.1  IDEVAAVGLFKSTKNFVDASNG--KMSAFFEADTI---PRL--LTRH
WP_027295337.1  IDEVAAVGLFESLMNFMEASTG--KQTAFFSREIVQTE-T-K---ANH
WP_070041796.1  IDEVAAVGLFESLMNFMEASTG--KQTAFFSREIVQTE-T-K---ANH
CVH74462.1      IDEVPAVGLFESLMNFDASGG--KSTQFFER-ETI--PEL-K--KNH
WP_081832803.1  IDEVPAVGMMRSTHNFVDAGTG--KYTYFFETP--TV--PKL--KKNH

```

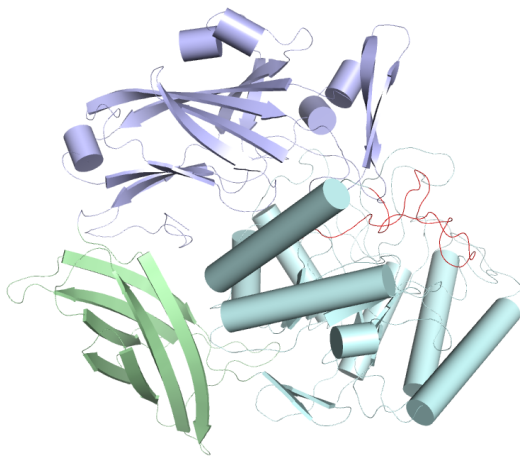

### (e) The *BfGUS* group: Loop 3

```

WP_010991991.1 335 KHGIVTWAEIPFVGPGGYADKGFVDQASFRNGKQQLIELIROHYN
WP_042369167.1 KYGIITWAEIPFVGPGGYADKGFVDQTSFRNGKQLQLIELIROHYN
WP_073345524.1 KNGIIVWAEIPFVGPGGYNDKGFVDLPAFRANGKEQLKELIROHYN
WP_061448150.1 KNGIIVWAEIPFVGPGGYNDKGFVDLPAFRANGKEQLKELIROHYN
WP_008765620.1 KNGIIVWAEIPFIPGGGYDDKGFVNLPFRANGKEQLKELIROHFN
WP_005851651.1 KHGIVTWAEIPFVGPGGYADKGFVDQPSFRNGKEQLKELIROHYN
WP_005937452.1 RNGIVTWAEIPFVGPGGYADKGFVDQPSFRNGKEQLKELIROHFN
CDF16335.1 RNGIVTWAEIPFVGPGGYADKGFVDQPSFRNGKEQLKELIROHFN
WP_016277820.1 KNGIIVWAEIPFVGPGGYADKGFVDQPSFRNGKEQLKELIROHYN
WP_008861178.1 QSGIITWAEIPFIPGGGYADKGFIDSEAFKNGEEQLKELIROQYN
WP_007840419.1 KYGIVTWAEIPFVGPGGYADKGFVDQPSFRNGKEQLKELIROHYN
OKZ42125.1 QSGIITWAEIPFVGPGGYADKGFIDSEAFKNGEEQLKELIROQYN
CCX61975.1 RYGIIVWAEIPFVGPGGYADKGFVDLPDFFRANGKEQLKELIROHGN
WP_097531265.1 RYGIIVWAEIPFVGPGGYMDKGFVNLPFRSNGKEQLRELIROHCN
WP_022021795.1 RYGIIVWAEIPFVGPGGYADKGFVDLPDFFRANGKEQLKELIROHGN
WP_013545761.1 RHGIVTWAEIPFVGPGGYADKGFVDQSSFRNGEQLRELIROHFN
RGM39504.1 KTGIITWAEIPFVGPGGYDDKGFVDFFDFRNGKNQLRELIROQYN
WP_075556066.1 KYGIVTWAEIPFIPGGGYLDRGYNDLPAFRANGKEQLKELIROHYN
CCY15266.1 RYGIIVWAEIPFVGPGGYSDKGFVNLPFRONGRQQLVELIROHYN
WP_048315356.1 KYGIVWAEIPFIPGGGYQDFGFNDLPSFRNGKEQLKELIROHYN
WP_076931253.1 KNGIIVWAEIPFIPGGGYALQGYVNPQPSFRNGKEQLIELIROHYN
WP_036874743.1 KHGMVWAEIPFVGPGGYADKGFVDLPLANARQQLKELIROQYN
WP_008154342.1 KYGIVTWAEIPQIPGGGYQDFGYINQPSFRNGKEQLKELIROHYN
WP_005647062.1 KYGIVTWAEIPQIPGGGYQDQGYINQPSFRNGKEQLKELIROHYN
WP_055097554.1 KYGLVWAEIPFVGPGGYQDQGFVNTSFRONGKEQLIELIROHYN
WP_044224780.1 KYGLVWAEIPFVGPGGYQDQGFVNTSFRONGKEQLIELIROHYN
CCY35738.1 KYGLVWAEIPFVGPGGYQDQGFVNTPSFCONGKEQLIELIROHYN
WP_051305258.1 RTGIVTWAEIPFVGPGGYADKGFVDTERFRDNGKQQLRELIROQYN
WP_091905861.1 KNGIIVWAEIPFIPGGGYALQGYVNPQPSFRKNGKQQLTELIROHYN
OJV91079.1 KGGIVWAEIPFIPGGGYQDFGFINLPFRANGTEQLRELIROHYN
WP_004314238.1 KLGIVWAEIPFIPGGGYDDKGFVDSPSFRANGKEQLKELIROHYN
WP_008565720.1 RAGIVTWAEIPFVGPGGYADKGFVDSEAFRANGKQQLRELIROHFN
WP_007135257.1 RAGIVTWAEIPFVGPGGYADKGFVDSKAFRDNKGKQQLIELIROQFN
WP_050756901.1 RAGIVTWAEIPFVGPGGYADKGFVDSERFRANGKAQLCELIROHFN
WP_066630907.1 KAGFVWSEIPFVGPGGYRDKGFVNQESFRDNGKQQLIELIROQYN
WP_072876176.1 KAGLVWSEIPFVGPGGYRDKGFVNQASFENGRITOLKELIYQOYN
WP_009137415.1 EYGFIVWAEIPFVGPGGYRDKGFVDQLSFRNGKIQLKELIROQYN

```

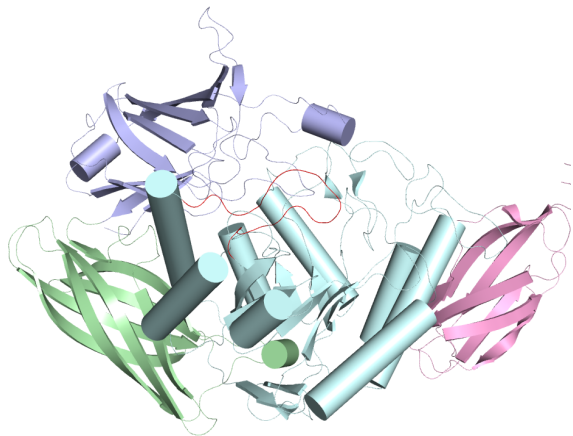

**Supplementary figure S7. Sequence alignment of bacterial GUSs.** (a) Sequences of  $\alpha$ -helix loop in the *BifdGUS* group, (b) Sequences of loops 3 of the *EcGUS*, (c) the *CpGUS* (d) the *RgGUS*, and (e) the *BfGUS* groups. Tertiary structures of *BifdGUS*, *EcGUS*, *CpGUS*, *RgGUS*, and *BfGUS* are followed each sequence alignment. Light blue, light green, light cyan, and light pink colors represent a N-terminal jelly-roll domain, a middle region immunoglobulin heavy chain-like domain, a TIM barrel domain, and a C-terminal carbohydrate binding domain, respectively. The sequences shown in the sequence alignments are highlighted in red color in the respective 3D structures.

**Supplementary Table S1. The kinetic parameters of bacterial GUSs.**

|           |                        | <i>Bifd</i> GUS   | <i>Rg</i> GUS      | <i>Cp</i> GUS               | <i>Ec</i> GUS                | <i>Bf</i> GUS    | <sup>1</sup> <i>Cp</i> GUS <sup><i>Rg</i>GUSL5</sup> | <i>Cp</i> GUS <sup>M448F</sup> |
|-----------|------------------------|-------------------|--------------------|-----------------------------|------------------------------|------------------|------------------------------------------------------|--------------------------------|
| <b>4</b>  | $K_M$<br>( $\mu$ M)    | 1359 $\pm$ 227.7  | 9320 $\pm$ 2700    | 160.6 $\pm$ 0.4             | 201.0 $\pm$ 12.9             | 2402 $\pm$ 604   | 289.7 $\pm$ 15.9                                     | 242.3 $\pm$ 11.8               |
|           | $k_{cat}$ ( $s^{-1}$ ) | 112.6 $\pm$ 8.2   | 24.7 $\pm$ 5.8     | 139.0 $\pm$ 3.9             | 212.8 $\pm$ 4.5              | 35.3 $\pm$ 6.0   | 23.9 $\pm$ 0.2                                       | 162.5 $\pm$ 0.8                |
| <b>5</b>  | $K_M$<br>( $\mu$ M)    | 715.6 $\pm$ 0.8   | 1096 $\pm$ 273     | 134.9 $\pm$ 15.4            | 190.4 $\pm$ 10.5             | 398.8 $\pm$ 38.3 | ND                                                   | ND                             |
|           | $k_{cat}$ ( $s^{-1}$ ) | 3.1 $\pm$ 0.4     | 13.6 $\pm$ 2.1     | 33.1 $\pm$ 2.5              | 76.8 $\pm$ 1.5               | 40.4 $\pm$ 1.7   | ND                                                   | ND                             |
| <b>10</b> | $K_M$<br>( $\mu$ M)    | 1175.0 $\pm$ 45.3 | 930.6 $\pm$ 270.6  | 33.5 $\pm$ 0.5              | 74.8 $\pm$ 3.8               | N/a              | ND                                                   | ND                             |
|           | $k_{cat}$ ( $s^{-1}$ ) | 19.4 $\pm$ 0.6    | 34.7 $\pm$ 7.4     | 112.6 $\pm$ 0.9             | 41.1 $\pm$ 1.4               | N/a              | ND                                                   | ND                             |
| <b>12</b> | $K_M$<br>( $\mu$ M)    | 646.0 $\pm$ 55.9  | 2431.8 $\pm$ 612.0 | 89.4 $\pm$ 0.6              | 116.7 $\pm$ 1.7              | 98.8 $\pm$ 1.8   | 57.7 $\pm$ 0.8                                       | 233.1 $\pm$ 21.1               |
|           | $k_{cat}$ ( $s^{-1}$ ) | 17.2 $\pm$ 1.5    | 11.2 $\pm$ 2.2     | 59.0 $\pm$ 1.5              | 79.9 $\pm$ 0.4               | 9.3 $\pm$ 0.1    | 8.4 $\pm$ 0.8                                        | 86.4 $\pm$ 21.1                |
| <b>17</b> | $K_M$<br>( $\mu$ M)    | 363.5 $\pm$ 5.9   | 51.4 $\pm$ 22.9    | 40.6 $\pm$ 2.2              | 23.0 $\pm$ 12.9 <sup>a</sup> | ND               | 245.0 $\pm$ 44.5                                     | 44.5 $\pm$ 0.1                 |
|           | $k_{cat}$ ( $s^{-1}$ ) | 55.4 $\pm$ 2.0    | 0.6 $\pm$ 0.1      | 54.1 $\pm$ 1.6              | 0.5 $\pm$ 0.1 <sup>a</sup>   | ND               | 1.6 $\pm$ 0.1                                        | 4.6 $\pm$ 0.0                  |
| <b>18</b> | $K_M$<br>( $\mu$ M)    | ND                | 117.6 $\pm$ 4.4    | 54.7 $\pm$ 2.5 <sup>a</sup> | ND                           | ND               | 146.6 $\pm$ 13.2                                     | N/a                            |
|           | $k_{cat}$ ( $s^{-1}$ ) | ND                | 0.7 $\pm$ 0.0      | 0.2 $\pm$ 0.0 <sup>a</sup>  | ND                           | ND               | 1.1 $\pm$ 0.1                                        | N/a                            |

N/a-Not available

ND-Not detectable (activity is too low for kinetics experiment)

<sup>a</sup>Estimated by using high concentration of enzymes<sup>1</sup>Original sequence 446 **YLM** of loop 5 of *Cp*GUS is replaced by the sequence 452 **EKN** of loop 5 of *Rg*GUS.

**Table S2. The catalytic efficiency ( $k_{cat}/K_M$ ; 1/s•mM) of bacterial GUSs.**

| Substrates                              | 4                | 5     | 10    | 12    | 17                | 18   |
|-----------------------------------------|------------------|-------|-------|-------|-------------------|------|
| <i>Bifd</i> GUS                         | 82.9             | 4.4   | 16.5  | 26.6  | 152.4             | ND   |
| <i>Rg</i> GUS                           | 2.7 <sup>a</sup> | 12.4  | 37.8  | 4.6   | 12.9              | 5.65 |
| <i>Cp</i> GUS                           | 865.5            | 363.7 | 956.9 | 659.9 | 1332.5            | 3.1  |
| <i>Ec</i> GUS                           | 1058.7           | 403.4 | 549.7 | 684.7 | 21.7 <sup>a</sup> | ND   |
| <i>Bj</i> GUS                           | 14.7             | 101.3 | N/a   | 94.1  | ND                | ND   |
| <i>Cp</i> GUS <sup><i>Rg</i>GUSL5</sup> | 82.7             | N/a   | N/a   | 145.6 | 6.5               | 7.5  |
| <i>Rg</i> GUS <sup><i>Cp</i>GUSL5</sup> | 57.7             | N/a   | N/a   | 5.98  | N/a               | ND   |
| <i>Cp</i> GUS <sup>M448F</sup>          | 671.5            | N/a   | N/a   | 370.8 | 103.4             | N/a  |

ND-Not detectable (activity is too low for kinetic experiment)

N/a-Not available

<sup>a</sup>Estimated by using high concentration of enzymes

**Supplementary Table S3. X-ray data collection and refinement statistics**

|                               | <i>Bfg</i> GUS/UIFG<br>(5Z1A) | <i>Rg</i> GUS apo<br>(5Z18)  | <i>Rg</i> GUS/UIFG<br>(5Z19) | <i>Bifd</i> GUS <sup>E479A</sup> /Coum-3-G<br>(5Z1B) |
|-------------------------------|-------------------------------|------------------------------|------------------------------|------------------------------------------------------|
| Data collection               |                               |                              |                              |                                                      |
| Space group                   | I222                          | C121                         | C121                         | P1211                                                |
| Cell dimension<br>a, b, c (Å) | 80.253, 103.135,<br>199.147   | 181.868, 118.182,<br>210.355 | 181.282 112.359<br>209.795   | 91.34 104.165 160.673                                |
| $\alpha, \beta, \gamma$ (deg) | 90, 90, 90                    | 90, 93.45, 90                | 90 93.45 90                  | 90 90.4 90                                           |
| Resolution (Å)                | 29.40 -1.86<br>(1.93-1.86)    | 29.03-2.495<br>(2.585-2.495) | 29.92-2.503<br>(2.593-2.503) | 29.16-1.45<br>(1.502-1.45)                           |
| I/s                           | 26.17 (3.57)                  | 11.14 (3.86)                 | 6.49 (1.74)                  | 27.36 (1.90)                                         |
| Completeness (%)              | 99.1 (98.3)                   | 98.9 (99.2)                  | 98.9 (97.3)                  | 99.5 (97.8)                                          |
| Redundancy                    | 4.2 (3.6)                     | 3.8 (3.9)                    | 3.2 (2.6)                    | 3.6 (3.2)                                            |
| Refinement                    |                               |                              |                              |                                                      |
| $R_{work}/R_{free}$           | 0.1578/0.1895                 | 0.1672/0.2094                | 0.1842/0.2187                | 0.1301/0.1602                                        |
| B factors (mean)              | 22.74                         | 36.50                        | 42.12                        | 21.60                                                |
| Macromolecules                | 21.08                         | 36.40                        | 42.15                        | 20.40                                                |
| Ligand                        | 16.02                         | -                            | 38.23                        | 26.90                                                |
| Water                         | 33.34                         | 38.20                        | 41.20                        | 31.70                                                |
| R.m.s deviations              |                               |                              |                              |                                                      |
| Bond lengths (Å)              | 0.005                         | 0.009                        | 0.004                        | 0.012                                                |
| Bond angles (deg)             | 0.98                          | 1.24                         | 0.99                         | 1.40                                                 |
| Ramachandran favored<br>(%)   | 97                            | 97                           | 96                           | 97                                                   |
| Ramachandran outliers<br>(%)  | 0.00                          | 0.086                        | 0.31                         | 0.041                                                |
